# Supplementary material for: Strategies to improve implementation of cascade testing in hereditary cancer syndromes: a systematic review
Source: PubMed Central journal article supplement (PMC10991315; doi:10.1038/s41525-024-00412-0), 2024-04-03
Supplement: 41525_2024_412_MOESM1_ESM.pdf [file 41525_2024_412_MOESM1_ESM.pdf]

## Supplementary Information

Supplementary Table 1. Search strategy for databases

| Database (date searched) | Query | Search strategy                                                                                                                                                                                                                                                                                                                                                                                                        | No. of results |
|--------------------------|-------|------------------------------------------------------------------------------------------------------------------------------------------------------------------------------------------------------------------------------------------------------------------------------------------------------------------------------------------------------------------------------------------------------------------------|----------------|
| PubMed (9 Nov 22)        | 1     | "neoplastic syndromes, hereditary"[MeSH Terms]                                                                                                                                                                                                                                                                                                                                                                         | 56586          |
|                          | 2     | (cancer*[Title/Abstract] OR neoplasm*[Title/Abstract] OR neoplastic[Title/Abstract]) AND (hereditary[Title/Abstract] OR predispos*[Title/Abstract] OR inherit*[Title/Abstract] OR familial[Title/Abstract])                                                                                                                                                                                                            | 52371          |
|                          | 3     | #1 OR #2                                                                                                                                                                                                                                                                                                                                                                                                               | 99813          |
|                          | 4     | "genetic testing"[MeSH Terms:noexp]                                                                                                                                                                                                                                                                                                                                                                                    | 43802          |
|                          | 5     | "family test*" [Title/Abstract] OR "family screen*" [Title/Abstract] OR "family variant test*" [Title/Abstract] OR "family genetic test*" [Title/Abstract] OR "cascade test*" [Title/Abstract] OR "cascade screen*" [Title/Abstract] OR "cascade genetic test*" [Title/Abstract] OR "cascade genetic screen*" [Title/Abstract] OR "predictive screen*" [Title/Abstract] OR "predictive genetic test*" [Title/Abstract] | 2976           |
|                          | 6     | #4 OR #5                                                                                                                                                                                                                                                                                                                                                                                                               | 45841          |
|                          | 7     | "referral and consultation"[MeSH Terms]                                                                                                                                                                                                                                                                                                                                                                                | 84140          |
|                          | 8     | referral*[Title/Abstract] OR "second opinion*" [Title/Abstract] OR "consult*" [Title/Abstract] OR "appointment*" [Title/Abstract] OR "schedule*" [Title/Abstract] OR "uptake" [Title/Abstract] OR "decision making" [Title/Abstract] OR "decision-making" [Title/Abstract] OR "decisionmaking" [Title/Abstract]                                                                                                        | 1030351        |
|                          | 9     | #7 OR #8                                                                                                                                                                                                                                                                                                                                                                                                               | 1066918        |
|                          | 10    | #3 AND #6 AND #9                                                                                                                                                                                                                                                                                                                                                                                                       | 802            |
|                          | 11    | #3 AND #6 AND #9 Filters: from 2010 – 2022                                                                                                                                                                                                                                                                                                                                                                             | 588            |
| Embase (24 Aug 22)       | 1     | exp hereditary tumor syndrome/                                                                                                                                                                                                                                                                                                                                                                                         | 57165          |
|                          | 2     | (cancer* or neoplasm* or neoplastic).ab,ti.                                                                                                                                                                                                                                                                                                                                                                            | 3137278        |
|                          | 3     | (hereditary or predispos* or inherit* or familial).ab,ti.                                                                                                                                                                                                                                                                                                                                                              | 568700         |
|                          | 4     | 2 and 3                                                                                                                                                                                                                                                                                                                                                                                                                | 73818          |
|                          | 5     | 1 or 4                                                                                                                                                                                                                                                                                                                                                                                                                 | 119588         |
|                          | 6     | *genetic screening/                                                                                                                                                                                                                                                                                                                                                                                                    | 20103          |
|                          | 7     | ("cascade test*" or "family test*" or "family variant test*" or "cascade screen*" or "family screen*" or "predictive screen*" or "predictive genetic test*" or "cascade genetic test*" or "cascade genetic screen*").ab,ti.                                                                                                                                                                                            | 4753           |
|                          | 8     | 6 or 7                                                                                                                                                                                                                                                                                                                                                                                                                 | 24178          |
|                          | 9     | exp patient referral/                                                                                                                                                                                                                                                                                                                                                                                                  | 141365         |
|                          | 10    | (referral* or "second opinion*" or "consult*" or "health service gatekeep*" or "appointment*" or "Schedule*" or "uptake" or "decision making" or "decision-making").ab,ti.                                                                                                                                                                                                                                             | 1422181        |
|                          | 11    | 9 or 10                                                                                                                                                                                                                                                                                                                                                                                                                | 1479438        |

|                              |    |                                                                                                                                                                                                                                                                                                                               |                                                                                                                                               |
|------------------------------|----|-------------------------------------------------------------------------------------------------------------------------------------------------------------------------------------------------------------------------------------------------------------------------------------------------------------------------------|-----------------------------------------------------------------------------------------------------------------------------------------------|
|                              | 12 | 5 and 8 and 11                                                                                                                                                                                                                                                                                                                | 627                                                                                                                                           |
|                              | 13 | 5 and 8 and 11<br>limit 12 to yr="2010 - 2022"                                                                                                                                                                                                                                                                                | 551                                                                                                                                           |
|                              |    |                                                                                                                                                                                                                                                                                                                               |                                                                                                                                               |
| Web of Science (26 Aug 22)   | 1  | TS=("neoplastic syndromes, hereditary")                                                                                                                                                                                                                                                                                       | 17                                                                                                                                            |
|                              | 2  | TS=((cancer* OR neoplasm* OR neoplastic) AND (hereditary OR predispos* OR inherit* OR familial))                                                                                                                                                                                                                              | 65440                                                                                                                                         |
|                              | 3  | #1 OR #2                                                                                                                                                                                                                                                                                                                      | 65440                                                                                                                                         |
|                              | 4  | TS="genetic testing"                                                                                                                                                                                                                                                                                                          | 28403                                                                                                                                         |
|                              | 5  | TS=("cascade test*" OR "family test*" OR "family variant test*" OR "cascade screen*" OR "family screen*" OR "predictive screen*" OR "predictive genetic test*" OR "cascade genetic test*" OR "cascade genetic screen*")                                                                                                       | 3316                                                                                                                                          |
|                              | 6  | #4 OR #5                                                                                                                                                                                                                                                                                                                      | 30572                                                                                                                                         |
|                              | 7  | TS=("referral and consultation")                                                                                                                                                                                                                                                                                              | 952                                                                                                                                           |
|                              | 8  | TS=(referral* OR "second opinion*" OR "consult*" OR "health service gatekeep*" OR "appointment*" OR "Schedule*" OR "uptake" OR "decision making" OR "decision-making")                                                                                                                                                        | 1634013                                                                                                                                       |
|                              | 9  | #7 OR #8                                                                                                                                                                                                                                                                                                                      | 1634013                                                                                                                                       |
|                              | 10 | #3 AND #6 AND #9                                                                                                                                                                                                                                                                                                              | 1018                                                                                                                                          |
|                              |    |                                                                                                                                                                                                                                                                                                                               | #3 AND #6 AND #9 and 2010 or 2011 or 2012 or 2022 or 2021 or 2020 or 2019 or 2018 or 2017 or 2016 or 2015 or 2014 or 2013 (Publication Years) |
|                              |    |                                                                                                                                                                                                                                                                                                                               |                                                                                                                                               |
| Cochrane Library (29 Aug 22) | 1  | [mh "neoplastic syndromes, hereditary"]                                                                                                                                                                                                                                                                                       | 535                                                                                                                                           |
|                              | 2  | (cancer*:ti,ab OR neoplasm*:ti,ab OR neoplastic:ti,ab) AND (hereditary:ti,ab OR predispos*:ti,ab OR inherit*:ti,ab OR familial:ti,ab)                                                                                                                                                                                         | 1223                                                                                                                                          |
|                              | 3  | #1 OR #2                                                                                                                                                                                                                                                                                                                      | 1667                                                                                                                                          |
|                              | 4  | [mh ^"genetic testing"]                                                                                                                                                                                                                                                                                                       | 422                                                                                                                                           |
|                              | 5  | (cascade NEXT test*):ti,ab OR (family NEXT test*):ti,ab OR ("family variant" NEXT test*):ti,ab OR (cascade NEXT screen*):ti,ab OR (family NEXT screen*):ti,ab OR (predictive NEXT screen*):ti,ab OR ("predictive genetic" NEXT test*):ti,ab OR ("cascade genetic" NEXT test*):ti,ab OR ("cascade genetic" NEXT screen*):ti,ab | 71                                                                                                                                            |
|                              | 6  | #4 OR #5                                                                                                                                                                                                                                                                                                                      | 486                                                                                                                                           |
|                              | 7  | [mh "referral and consultation"]                                                                                                                                                                                                                                                                                              | 2543                                                                                                                                          |
|                              | 8  | referral*:ti,ab OR (second NEXT opinion*):ti,ab OR consult*:ti,ab OR ("health service" NEXT gatekeep*):ti,ab OR appointment*:ti,ab OR Schedule*:ti,ab OR uptake:ti,ab OR "decision making":ti,ab OR decision-making:ti,ab                                                                                                     | 121518                                                                                                                                        |
|                              | 9  | #7 OR #8                                                                                                                                                                                                                                                                                                                      | 122266                                                                                                                                        |
|                              | 10 | #3 AND #6 AND #9                                                                                                                                                                                                                                                                                                              | 40                                                                                                                                            |
|                              | 11 | #3 AND #6 AND #9<br>with Cochrane Library publication date from Jan 2010 to Jun 2022                                                                                                                                                                                                                                          | 29                                                                                                                                            |
|                              |    |                                                                                                                                                                                                                                                                                                                               |                                                                                                                                               |
| CINAHL (29 Aug 22)           | 1  | MH("neoplastic syndromes, hereditary"+)                                                                                                                                                                                                                                                                                       | 1138                                                                                                                                          |
|                              | 2  | ((TI cancer* OR AB cancer*) OR (TI neoplasm* OR AB neoplasm*) OR (TI neoplastic OR AB neoplastic)) AND ((TI                                                                                                                                                                                                                   | 5582                                                                                                                                          |

|                         |    |                                                                                                                                                                                                                                                                                                                                                                                                                                                                                                                  |        |
|-------------------------|----|------------------------------------------------------------------------------------------------------------------------------------------------------------------------------------------------------------------------------------------------------------------------------------------------------------------------------------------------------------------------------------------------------------------------------------------------------------------------------------------------------------------|--------|
|                         |    | hereditary OR AB hereditary) OR (TI predispos* OR AB predispos*) OR (TI inherit* OR AB inherit*) OR (TI familial OR AB familial))                                                                                                                                                                                                                                                                                                                                                                                |        |
|                         | 3  | S1 OR S2                                                                                                                                                                                                                                                                                                                                                                                                                                                                                                         | 6771   |
|                         | 4  | MH("genetic testing")                                                                                                                                                                                                                                                                                                                                                                                                                                                                                            | 1105   |
|                         | 5  | (TI "cascade test*" OR AB "cascade test*") OR (TI "family test*" OR AB "family test*") OR (TI "family variant test*" OR AB "family variant test*") OR (TI "cascade screen*" OR AB "cascade screen*") OR (TI "family screen*" OR AB "family screen*") OR (TI "predictive screen*" OR AB "predictive screen*") OR (TI "predictive genetic test*" OR AB "predictive genetic test*") OR (TI "cascade genetic test*" OR AB "cascade genetic test*") OR (TI "cascade genetic screen*" OR AB "cascade genetic screen*") | 787    |
|                         | 6  | S4 OR S5                                                                                                                                                                                                                                                                                                                                                                                                                                                                                                         | 1382   |
|                         | 7  | (MH "referral and consultation"+)                                                                                                                                                                                                                                                                                                                                                                                                                                                                                | 124    |
|                         | 8  | (TI referral* OR AB referral*) OR (TI "second opinion*" OR AB "second opinion*") OR (TI consult* OR AB consult*) OR (TI "health service gatekeep*" OR AB "health service gatekeep*") OR (TI appointment* OR AB appointment*) OR (TI Schedule* OR AB Schedule*) OR (TI uptake OR AB uptake) OR (TI "decision making" OR AB "decision making") OR (TI decision-making OR AB decision-making)                                                                                                                       | 286122 |
|                         | 9  | S7 OR S8                                                                                                                                                                                                                                                                                                                                                                                                                                                                                                         | 286181 |
|                         | 10 | S3 AND S6 AND S9                                                                                                                                                                                                                                                                                                                                                                                                                                                                                                 | 17     |
|                         | 11 | S3 AND S6 AND S9<br>Limiters - Published Date: 20100101-20220631                                                                                                                                                                                                                                                                                                                                                                                                                                                 | 17     |
|                         |    |                                                                                                                                                                                                                                                                                                                                                                                                                                                                                                                  |        |
| PsycINFO<br>(29 Aug 22) | 1  | MH("neoplastic syndromes, hereditary"+)                                                                                                                                                                                                                                                                                                                                                                                                                                                                          | 81     |
|                         | 2  | ((TI cancer* OR AB cancer*) OR (TI neoplasm* OR AB neoplasm*) OR (TI neoplastic OR AB neoplastic)) AND ((TI hereditary OR AB hereditary) OR (TI predispos* OR AB predispos*) OR (TI inherit* OR AB inherit*) OR (TI familial OR AB familial))                                                                                                                                                                                                                                                                    | 1737   |
|                         | 3  | S1 OR S2                                                                                                                                                                                                                                                                                                                                                                                                                                                                                                         | 3249   |
|                         | 4  | MH("genetic testing")                                                                                                                                                                                                                                                                                                                                                                                                                                                                                            | 1      |
|                         | 5  | (TI "cascade test*" OR AB "cascade test*") OR (TI "family test*" OR AB "family test*") OR (TI "family variant test*" OR AB "family variant test*") OR (TI "cascade screen*" OR AB "cascade screen*") OR (TI "family screen*" OR AB "family screen*") OR (TI "predictive screen*" OR AB "predictive screen*") OR (TI "predictive genetic test*" OR AB "predictive genetic test*") OR (TI "cascade genetic test*" OR AB "cascade genetic test*") OR (TI "cascade genetic screen*" OR AB "cascade genetic screen*") | 352    |
|                         | 6  | S4 OR S5                                                                                                                                                                                                                                                                                                                                                                                                                                                                                                         | 353    |
|                         | 7  | (MH "referral and consultation"+)                                                                                                                                                                                                                                                                                                                                                                                                                                                                                | 32     |
|                         | 8  | (TI referral* OR AB referral*) OR (TI "second opinion*" OR AB "second opinion*") OR (TI consult* OR AB consult*) OR (TI "health service gatekeep*" OR AB "health service gatekeep*") OR (TI appointment* OR AB appointment*) OR (TI Schedule*                                                                                                                                                                                                                                                                    | 246901 |

|                            |    |                                                                                                                                                                                                                                                   |        |
|----------------------------|----|---------------------------------------------------------------------------------------------------------------------------------------------------------------------------------------------------------------------------------------------------|--------|
|                            |    | OR AB Schedule*) OR (TI uptake OR AB uptake) OR (TI "decision making" OR AB "decision making") OR (TI decision-making OR AB decision-making)                                                                                                      |        |
|                            | 9  | S7 OR S8                                                                                                                                                                                                                                          | 246913 |
|                            | 10 | S3 AND S6 AND S9                                                                                                                                                                                                                                  | 12     |
|                            | 11 | S3 AND S6 AND S9<br>Limiters - Publication Year: 2010-2022                                                                                                                                                                                        | 7      |
|                            |    |                                                                                                                                                                                                                                                   |        |
| Google Scholar (26 Aug 22) | 1  | cancer neoplasm hereditary familial "cascade test" "family variant test" "cascade screen" "family screen" "predictive screen" "predictive genetic test" "cascade genetic test" "cascade genetic screen" referral consult uptake "decision making" | 861    |
|                            |    | Filter: 2010 - 2022                                                                                                                                                                                                                               | 489    |

Supplementary Table 2. Study inclusion and exclusion criteria

|                       |                                                                                                                                                                                                                                                                                                       |
|-----------------------|-------------------------------------------------------------------------------------------------------------------------------------------------------------------------------------------------------------------------------------------------------------------------------------------------------|
| Included studies      |                                                                                                                                                                                                                                                                                                       |
| Qualitative studies   | Randomized controlled trials, controlled before and after studies, interrupted time series analyses, prospective or retrospective cohort studies, case-control studies, and cross-sectional studies that explain any kind of intervention that pertains to cascade genetic testing and testing uptake |
| Qualitative studies   | Individual interviews, focus group discussions, ethnographic interviews and participant observation, which investigated the implementation of interventions related to genetic screening and testing or which documented people's experiences with those interventions                                |
| Mixed methods studies | Interaction of process and implementation factors with engagement in cascade genetic testing uptake                                                                                                                                                                                                   |
| Excluded studies      |                                                                                                                                                                                                                                                                                                       |
| Reviews               | Literature reviews, scoping reviews and systematic reviews                                                                                                                                                                                                                                            |
| Others                | Non-peer reviewed publications, conference abstracts, editorials, and opinion pieces.                                                                                                                                                                                                                 |
| Other languages       | Non-English publications                                                                                                                                                                                                                                                                              |
